# Supplementary figures and images for: Oral vaccination with a recombinant Salmonella vaccine vector provokes systemic HIV-1 subtype C Gag-specific CD4+ Th1 and Th2 cell immune responses in mice
Source: Springer Nature journal article supplement (doi:10.1186/1743-422x-6-87), 2009-06-25

**A**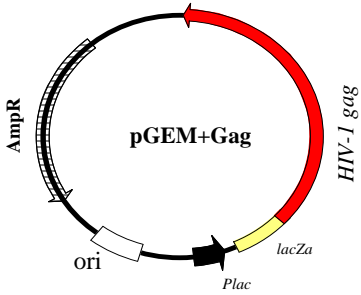**B**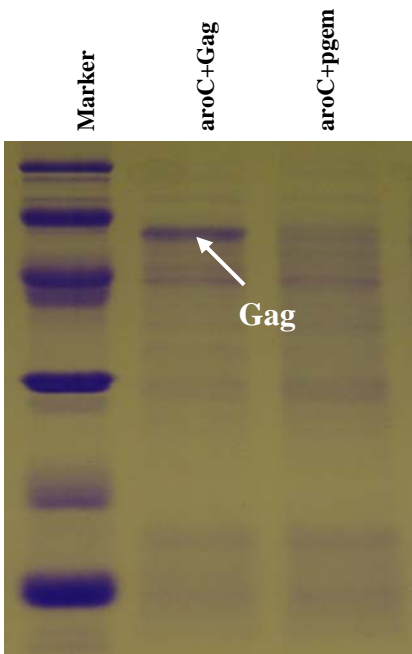**C**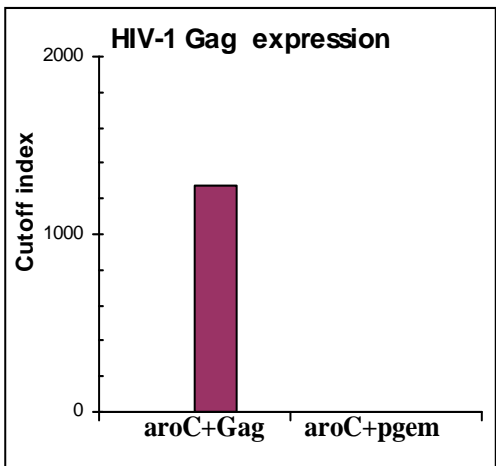

Supplement: 12985_2009_601_MOESM1_ESM.pdf [file 12985_2009_601_MOESM1_ESM.pdf]

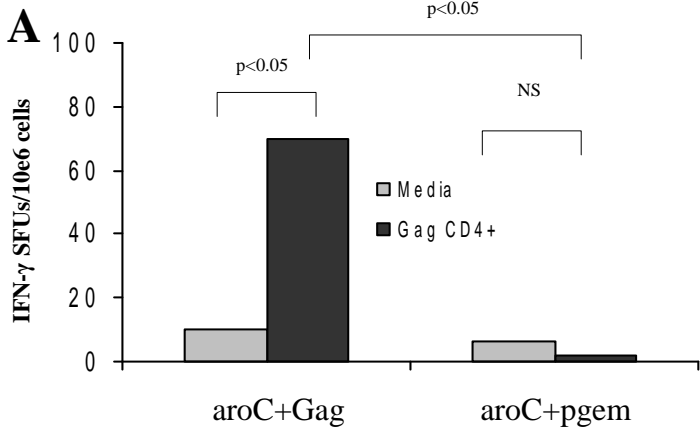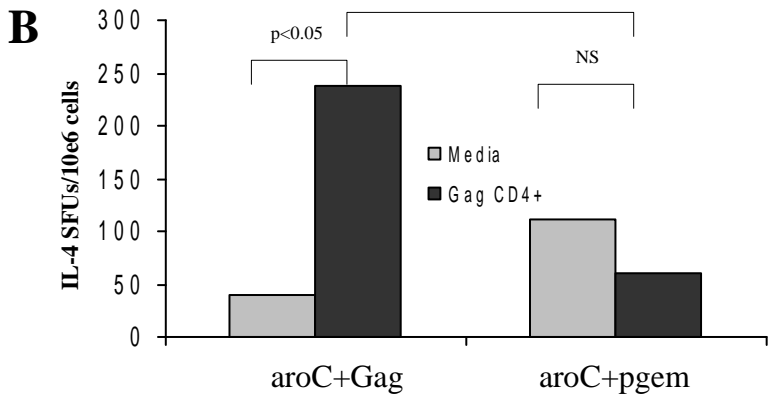

Supplement: 12985_2009_601_MOESM2_ESM.pdf [file 12985_2009_601_MOESM2_ESM.pdf]

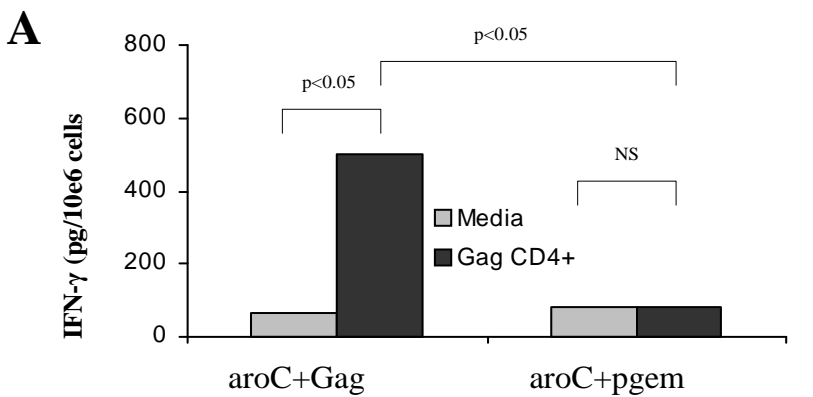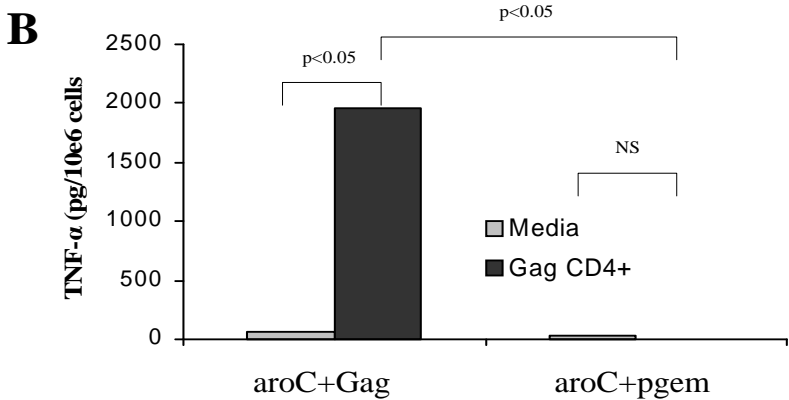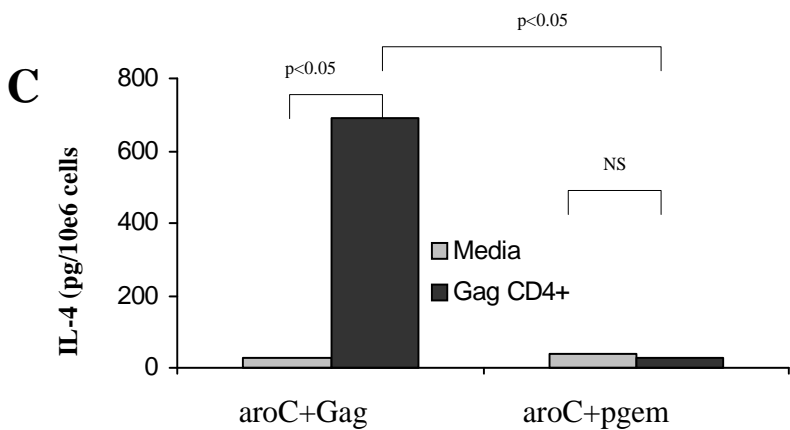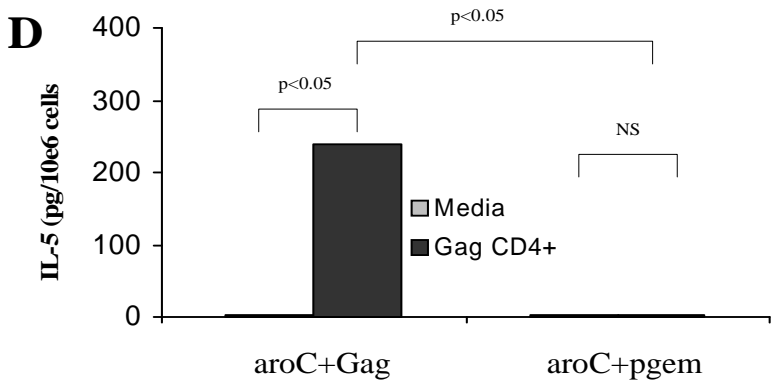

Supplement: 12985_2009_601_MOESM3_ESM.pdf [file 12985_2009_601_MOESM3_ESM.pdf]

**A**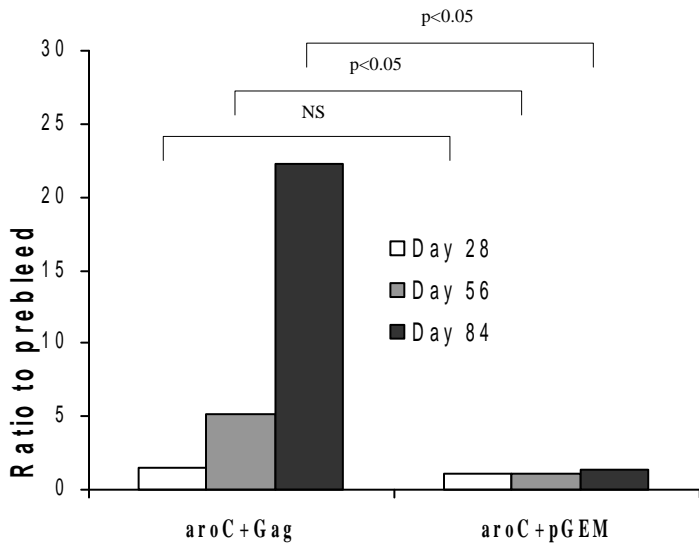**B**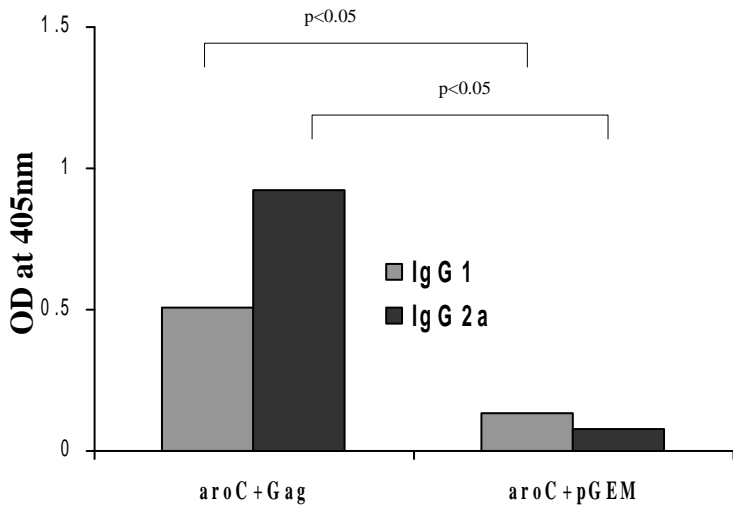

Supplement: 12985_2009_601_MOESM4_ESM.pdf [file 12985_2009_601_MOESM4_ESM.pdf]
